# Supplementary material
Source: PubMed Central journal article supplement (PMC2694939)

## Supplemental Data

### The Structure of a Receptor with Two Associating Transmembrane Domains on the Cell Surface: Integrin $\alpha_{IIb}\beta_3$

Jieqing Zhu, Bing-Hao Luo, Patrick Barth, Jack Schonbrun, David Baker, and Timothy A. Springer

#### Supplemental Experimental Procedures

##### Plasmid Construction and Transient Transfection

Plasmids encoding full-length human  $\alpha_{IIb}$  and  $\beta_3$  were subcloned into pEF/V5-HisA and pcDNA3.1/Myc-His(+), respectively (Takagi et al., 2002). To make the integrin/glycophorin A chimeras, the transmembrane and cytoplasmic domains of the  $\alpha_{IIb}$  and  $\beta_3$  subunit were replaced with human glycophorin A sequences, E60-Q131 or P71-Q131. Single amino acid substitutions to cysteine were made using site-directed mutagenesis with the QuikChange Kit (Stratagene, La Jolla, CA). The wild type or mutant constructs were transfected into 293T cells using Fugene (Roche Diagnostics, Indianapolis, Indiana).

##### Ligand Binding Assay

Ligand mimetic IgM PAC-1 (Becton Dickinson, San Jose, CA) and FITC-labeled human fibrinogen (Enzyme Research Laboratories, South Bend, IN) binding to transfected cells was determined as described (Luo et al., 2004). In brief, 293T cell transfectants were incubated with 10  $\mu$ g/ml PAC-1 or 50  $\mu$ g/ml FITC-labeled fibrinogen at room temperature for 30 minutes in HEPES-buffered saline (20 mM HEPES, pH 7.4, 150 mM NaCl, 5.5 mM glucose, and 1% bovine serum albumin) containing 5 mM EDTA, or 1 mM  $Ca^{2+}/Mg^{2+}$ , or 1mM/ $Mn^{2+}$  plus 10  $\mu$ g/ml  $\alpha_{IIb}\beta_3$  specific activating mAb PT25-2. Then cells were incubated

with 10  $\mu\text{g/ml}$  of Cy3-labeled mAb AP3 on ice for 30 minutes before subjected to flow cytometry. For PAC-1 binding, cells were incubated with 10  $\mu\text{g/ml}$  of Cy3-labeled AP3 and 10  $\mu\text{g/ml}$  of FITC-labeled goat anti-mouse IgM at the same time. Ligand binding ability was expressed as the percentage of mean fluorescence intensity (MFI) of fibrinogen or PAC-1 binding after subtracting the MFI of fibrinogen or PAC-1 binding in EDTA condition relative to the MFI of AP3 binding.

### **Disulfide Crosslinking and Immunoprecipitation**

Twenty-four hours after transfection, 293T cells in 12-well plates with 1.5 ml DMEM medium containing 10% FCS were pre-treated with 15  $\mu\text{g/ml}$  of 2-BP for 1 hour, the medium was replaced with 0.75 ml Met, Cys-free RPMI1640 (Sigma R-7513), supplemented with 10% dialyzed FCS, 10  $\mu\text{l}$  [ $^{35}\text{S}$ ] cysteine/methionine (10mCi/ml, PerkinElmer Life Science), 15  $\mu\text{g/ml}$  2-BP. After 1.5 h at 37°C, 0.75 ml of RPMI1640 containing 10% FCS, 500  $\mu\text{g/ml}$  cysteine, 100  $\mu\text{g/ml}$  methionine, and 15  $\mu\text{g/ml}$  2-BP was added, and cells chased for at least 17 hours. Cells were detached by vigorous pipetting, washed, and suspended ( $10^6$  cells in 100  $\mu\text{l}$ ) in Tris-buffered saline (TBS, 20 mM Tris-HCl, pH 7.5, 150 mM NaCl) containing 1 mM  $\text{Ca}^{2+}$ /1 mM  $\text{Mg}^{2+}$  and proteinase inhibitors (1  $\mu\text{g/ml}$  each aprotinin, leupeptin, and pepstatin). The cells were kept intact or broken by 3 cycles of freezing on dry ice and thawing. Saponin (40  $\mu\text{g/ml}$ ) gave results identical to freeze-thawing, but freeze-thawing was adapted as the least membrane-perturbing. After chilling on ice for 5 minutes, 200  $\mu\text{M}$   $\text{CuSO}_4$ /1000  $\mu\text{M}$  o-phenanthroline was added by 10 fold dilution from stock solution, and cells were incubated on ice for another 10 minutes. N-ethylmaleimide (10 mM) was added and after 10 minutes on ice, cells were lysed with an equal volume of TBS containing 2% Triton X-100 and 0.1% NP-40 for 10 minutes on ice. Cell lysates were cleared by centrifugation at 14000 RPM for 10

minutes and immunoprecipitated with anti- $\beta$ 3 mAb AP3 and protein G agarose at 4°C for 1 hour (Luo et al., 2004). The precipitated proteins were subjected to nonreducing 7.5% SDS-PAGE. The SDS-PAGE gel was dried and exposed for 3 h to storage phosphor screens, which were measured with a Storm PhosphorImager (Molecular Dynamics, Sunnyvale, California, United States). Disulfide bond formation was quantitated as the intensity of the disulfide-bonded heterodimer band divided by the sum of the intensity of  $\alpha_{IIB}$ ,  $\beta_3$ , and heterodimer bands. Specific intensity of each band was determined by subtraction of background intensity.

For constitutively crosslinked extracellular and exofacial residues, crosslinking was also measured in redox buffer and after DTT treatment followed by Cu-phenanthroline. For redox buffer treatment, cells were suspended in pH 8.2 TBS containing 1 mM  $\text{Ca}^{2+}$ /1 mM  $\text{Mg}^{2+}$  and 5 mM cysteamine/1 mM cystamine, and incubated at 37 °C for 1 hour. Following addition of 10 mM N-ethylmaleimide, cells were lysed and immunoprecipitated as described above. For DTT treatment, cells were incubated in pH 8.2 TBS containing 1 mM  $\text{Ca}^{2+}$ /1 mM  $\text{Mg}^{2+}$  and 10 mM DTT for 10 min at 37 °C, washed three times with TBS containing 1 mM  $\text{Ca}^{2+}$ /1 mM  $\text{Mg}^{2+}$ , and broken by freeze/thaw and treated with Cu-phenanthroline as described above.

Constitutive crosslinking for GPA residues 73-78 showed only slight periodicity, whereas redox buffer and DTT/Cu-phenanthroline gave similar, periodic peaks (Fig. S1A). Furthermore, the crosslinking results for residues that were dependent on Cu-phenanthroline, such as 79-80, were similar with or without DTT pretreatment (Fig. S1A). Therefore, results with DTT/Cu-phenanthroline were used for restraint calculation for all crosslinks involving GPA residues 73-78 and are shown in Fig. 2. In contrast, exofacial residues in integrins

showed good periodicity under constitutive conditions (Fig. 2), and we did not use data with reducing agents (Fig. S1B) in restraint calculation because DTT can activate integrins (Peerschke, 1995).

### **Disulfide-Based Distance Constraints**

Crosslinking data and restraints are in Supplementary Materials. To minimize effect of flexibility or cysteine substitution on crosslinking, all values were subjected to near-valley correction before restraint calculation. The % crosslinking of residues  $i$  with  $j$  was subtracted by the higher of ((the lowest % crosslinking found for residue  $i$  with residues  $j \pm 2$ ) or (the lowest % crosslinking found for residue  $j$  with residues  $i \pm 2$ )). This reduced broadening of crosslinking patterns (Fig. S5). Only crosslinking efficiencies equal to or larger than 20% were used for the calculation of upper boundary  $C_\alpha$ - $C_\alpha$  distances. The distance constraints for GPA were symmetrized (Table S4).

### **Membrane Structure Generation**

Structures were generated in three or four stages as shown in Fig. S6. In stage 1, 23-residue TM sequences were divided into three 12-residue, overlapping segments, denoted N-terminal (N) ( $\alpha_{I1b}$  I966-L977,  $\beta_3$  I693-I704, GPA I73-V84), middle (M) ( $\alpha_{I1b}$  G972-L983,  $\beta_3$  S699-A710, GPA G79-L90) and C-terminal (C) ( $\alpha_{I1b}$  L977-W988,  $\beta_3$  I704-W715, GPA V84-I95) (Fig. S6). The 12-residue N  $\alpha_{I1b}$  with N  $\beta_3$ , M  $\alpha_{I1b}$  with M  $\beta_3$ , etc. ideal helices were docked with an all-atom membrane force field (Barth et al., 2007) with the following command line: *Rosetta.gcc gd 1pdb chain i.d. -spanners 1pdb.span -fake\_native -membrane -dock -dock\_mcm -randomize1 -randomize2 -ex1 -ex2 -s 1pdb.pdb -nstruct 10000 -paths paths.txt*. This docking protocol samples backbone rigid-body and all side-chain conformational degrees of freedom. The 1,000 docked models with lowest Rosetta all-

atom energy were selected from 10,000 total decoys and pairwise disulfide-based constraint violations were calculated. 100 models with low pairwise constraints violation (in practice all 100 had no violations) were selected as the starting structures for stage 2. For integrins, both N and M helices yielded >100 docked structures with no restraint violations. Very similar 46-residue integrin TM segments (1.2 Å RMSD) were obtained after stage 3 starting with either the N or M 12-residue helices. The C 12-residue helix was not tested because of weaker disulfide restraints in this region. For GPA, 12-residue helix docking with the N, M, and C segments gave for the 100 models with lowest restraint violation, violation scores of 0,  $3.96 \pm 2.21$ , and  $3.45 \pm 0.71$ , respectively. Therefore, only the N segment was used for GPA structure generation.

In subsequent “chain growing” stages, the backbone coordinates of two or more residues were kept from the previous stage and remaining residues were rebuilt from N-terminal to C-terminal or from C-terminal to N-terminal at low-resolution by Monte-Carlo-based peptide fragment insertion and then refined at all-atom using disulfide distance constraints in both low resolution and all atom potentials (Barth et al., 2007). After use of the integrin M-helices in stage 1, residues L974-W988, M701-W715 (stage 2), L978-L959 and L705-P688 (stage 3), and L970-P998 and L697-A737 (stage 4) were grown in  $\alpha_{IIb}$  and  $\beta_3$ , respectively. GPA 12-residue N-helices were I73-V84 in stage 1, and in stages 2 and 3, residues A82-I73 and G79-I95 were grown, respectively.

Fragments used in fragment assembly were generated as described (Rohl et al., 2004), except that only SAM-T02 (Karplus et al., 2003) secondary structure prediction method was used during fragment selection. The “chain growing” stage was performed with the following command line: *Rosetta.gcc lg 1pdb chain i.d. -fake\_native -membrane -*

*no\_filters -loops -fold -l pdblist -nstruct 10000 -paths paths.txt -hb\_srbb\_reweight 0.0 -hb\_lrbb\_reweight 0.0 -pc\_reweight 1.0 -FA\_pc\_weight 1.0 -short\_rang\_hb\_weight 0.5 -use\_fold\_constrints\_no\_minimize -minimize\_exclude\_helix -fa\_refine -ex1 -ex2 -exlaro -extrachi\_cutoff 0 -thickness 15 -steepness 10 -mem\_solv -memb\_hb -mem\_env -Wmbenv 0.462289.* In each stage, 10,000 models were generated (100 decoys for each of the 100 starting structures) and 100 low energy, low constraint violation models were selected as starting structures for the following stage.

The final 10% lowest energy models were clustered based on C $\alpha$ -RMSD (Bonneau et al., 2002). Clustering was robust to the RMSD cutoff used. In clustering with 1.5, 1.8, 2.0, 2.5, and 3.0 Å cutoffs, similar top (most populous) clusters were found, and the structures at the center of the 1.8, 2.0, 2.5 and 3.0 Å top clusters were identical (Fig. S7). Clustering used TM+JM+CT  $\alpha_{\text{IIB}}$  I966-P998 and  $\beta_3$  I693-E731 residues or GPA TM residues 73-95, and results are summarized in Fig. S6B,D.

For comparison, the coordinates for the GPA solid state NMR structure (Smith et al., 2001) were kindly provided by Dr. S. O. Smith, SUNY Stony Brook, Stony Brook NY. Coordinates for previous integrin models were provided by Dr. K. Gottschalk, Ludwig-Maximilians U., München, Germany (Gottschalk, 2005), and Dr. J. Bowie, UCLA, Los Angeles, CA (Partridge et al., 2005).

### **Cross-Validation by Restraint Omission**

Restraints were randomly partitioned into approximately equal subsets (before symmetrization for GPA) of 1/8, 1/4, or 1/2 of restraints. These smaller subsets of 12.5%, 25%, or 50% of restraints, or no restraints, were used in all stages of structure generation, exactly as when all restraints were used. At least two groups of each size of restraint set were

used in structure generation. In each run of structure generation, the final 10% lowest energy structures were clustered at a 3.0 Å cutoff. The central structure in the largest cluster was examined by superposition to the GPA NMR model or GPA or integrin models made with complete restraints to calculate RMSD. Models were also scored for violation of the omitted restraints. RMSD and restraint violations were calculated over the TM segment (46 residues) or TM+cytoplasmic segments (78 residues). The root mean square distance violation (above the upper bound) per restraint was calculated for all omitted restraints (whether violated or not).

### **Modeling of the Full-Length Integrin Receptor in the Context of the Membrane Bilayer**

A modeling protocol was developed to assemble different domains in a membrane environment, to find low-energy conformations for the linkers consistent with disulfide crosslinking data, and to optimize the rigid-body orientations of each domain with respect to the membrane. The full-length integrin receptor structure was modeled in four stages.

In the first stage, the structures of A958-W968 of  $\alpha_{IIb}$  and E686-V695 of  $\beta_3$  were rebuilt by chain growing protocol from C to N with the structures of the TM+cytoplasmic domains in the largest cluster (52 structures, Figure 4A and Table S6B) as initial stubs. Redox buffer disulfide restraints were used for the residues L959-P695 of  $\alpha_{IIb}$  and P688-D692 of  $\beta_3$  (Table S3B). These restraints were validated based on crosslinking between nearby residues defined in  $\alpha_{IIb}\beta_3$  and  $\alpha_V\beta_3$  crystal structures; because of flexibility in crystal structures of the  $\beta_3$  tail domain (Zhu et al., 2008), restraints were loosened relative to the TM region (Fig. S12). Additional restraints were added from the  $\alpha_{IIb}\beta_3$  crystal structure. C $\alpha$ -C $\beta$ -C $\beta$ -C $\alpha$  and O-O atom distances between residues  $\alpha_{IIb}$  A958 and  $\beta_3$  E686 and between residues  $\alpha_{IIb}$  L959 and  $\beta_3$  C687 were used. The upper and lower bound distance

restraints were obtained by adding 2 Å and subtracting 1 Å, respectively, from distances in the  $\alpha_{IIB}\beta_3$  crystal structure (Zhu et al., 2008). All the restraints for TM+cytoplasmic residues were also kept. 100 models were generated for each starting structure. The 10% lowest energy models were selected and clustered (RMSD cutoff of 2 Å) based on the structures of the rebuilt residues. The center models of top 10 clusters were used for the next stage in full length model generation.

In a second stage, the crystal structure was joined to the linker segments. The lowest energy cluster center models of the TM and cytoplasmic (TM+CT) regions were assembled to the crystal structure of the ectodomains (chains A and B) with one extended linker connecting the domains in chain A (command line used: *rosetta.intel -assemble -regions -extend -s A2B3\_xtal\_tmhAB.pdb -nstruct 1*). This step involved selecting residues on chain A (residues 958 to 959) connecting the TM+CT and extracellular regions and modeling these residues as an extended polypeptide chain connecting the two regions. The other chain was left unclosed.

In a third stage, the linkers were remodeled simultaneously to optimize the rigid-body orientation of the ectodomain with respect to the membrane bilayer and the TM domains, and the remaining cut was closed. The redox buffer disulfide crosslinking restraints for the linker segments (Table S3B) were used as one of the energy terms (command line used: *rosetta\_assemble\_new.intel CE A2B3 -pose1 -pose\_memb -jumping -pairing\_file pairings.dat -membrane\_cst\_reweight 0 -membrane\_exposure\_reweight 0 -s A2B3.pdb -regions -regionfile region -spanfile A2B3.span -increase\_cycles 0.5 -cut\_for\_assemble -memb\_assemble -n A2B3.pdb -num\_TMH\_pairings 2 -skip\_closure -skip\_cut 953 -chain\_break\_reweight 50.0 -nstruct 20 -dump\_pdb -paths paths.txt*). To keep the relative



backbone orientations of each chain in both TM and ectodomains fixed, a “fold tree” was constructed for the polypeptide chain where two C $\alpha$  positions in each domain were connected and fixed in space during folding. The fold tree was designed so that the TM regions stayed fixed and embedded in the membrane while the ectodomain region was allowed to adopt different conformations with respect to the membrane by sampling the space as a rigid-body. The conformational space sampled by the ectodomain was dictated by the conformations of the loops connecting the TM+CT to the ectodomain. The connecting loops were modeled by Monte-Carlo-based insertion of 3-mer peptide fragments into  $\alpha_{11b}$  and  $\beta_3$  residues 958-965 and 688-692, respectively, while simultaneously scoring the entire receptor structure. This procedure allowed discarding loop conformations that would embed the ectodomain deeply in the membrane. A total of 6000 coarse-grained models were generated by modeling the loops connecting the TM+CT to the ectodomain. During this procedure, the original orientations of the linker fragments were altered. The models were clustered and the lowest energy cluster centers were refined at all-atom by sampling backbone / side-chain and side-chain conformational degrees of freedom for the remodeled loops and the remaining regions of the entire integrin structure, respectively.

In the fourth and final stage, two membrane proximal loops that are missing in density in calf-2 domain were remodeled in the context of the entire receptor embedded in the membrane. Residues 838-855 and 858-874 in a loop cleaved by furin, and 762-777 in another loop were added, and modeled as flexible loops that could conform to the orientation with respect to the membrane.

## Supplemental Tables

**Table S1. Comparison of Omitted Distance Restraints from Active Integrin Cysteine Mutants and the Average C $\alpha$ -C $\alpha$  Distance from the Cluster 1 Structure Ensemble**

| <b>allb</b> | <b><math>\beta</math>3</b> | <b>Crosslinking (%)</b> | <b>Corrected crosslinking (%)</b> | <b>Idealized distance (Å)</b> | <b>upper bound distance (Å)</b> | <b>C<math>\alpha</math>-C<math>\alpha</math> distance (52 models) (Å)</b> |
|-------------|----------------------------|-------------------------|-----------------------------------|-------------------------------|---------------------------------|---------------------------------------------------------------------------|
| G976        | M701                       | 62.0                    | 49.0                              | 6.03                          | 13.43                           | 4.29±0.51                                                                 |
| G976        | L698                       | 34.0                    | 31.0                              | 7.82                          | 15.85                           | 8.67±0.59                                                                 |
| G976        | G702                       | 53.7                    | 30.7                              | 6.56                          | 15.89                           | 7.26±0.53                                                                 |
| G976        | V700                       | 41.3                    | 28.3                              | 7.36                          | 16.21                           | 7.10±0.58                                                                 |
| G976        | L697                       | 36.0                    | 22.0                              | 7.70                          | 17.05                           | 8.81±0.64                                                                 |
| G976        | I707                       | 33.5                    | 22.5                              | 7.86                          | 17.25                           | 10.26±0.50                                                                |
| L978        | G708                       | 34.7                    | 20.2                              | 7.78                          | 17.29                           | 11.40±0.50                                                                |
| L979        | G708                       | 37.0                    | 28.0                              | 7.63                          | 16.25                           | 9.75±0.61                                                                 |
| L980        | G708                       | 58.0                    | 39.5                              | 6.29                          | 14.71                           | 6.67±0.56                                                                 |
| L983        | G708                       | 41.5                    | 37.5                              | 7.34                          | 14.98                           | 9.18±0.86                                                                 |
| V984        | G708                       | 41.5                    | 37.5                              | 7.34                          | 14.98                           | 9.25±0.76                                                                 |
| K994        | I719                       | 27.5                    | 27.5                              | 8.24                          | 16.32                           | 9.88±1.28                                                                 |
| K994        | D723                       | 21.5                    | 20.0                              | 8.62                          | 17.32                           | 11.25±1.10                                                                |
| R995        | D723                       | 33.3                    | 28.3                              | 7.87                          | 16.21                           | 8.09±1.14                                                                 |

**Table S2. Integrin Juxtamembrane Structure Characteristics among the 10% Lowest-Energy (500 Models) and Cluster 1 Ensemble**

|                                       | $\beta 3$ K716 $\epsilon$ -amino hydrogen bonding to $\alpha$ IIb F992 or K994 carbonyl oxygen <sup>a</sup> | $\alpha$ IIb R995 to $\beta 3$ D723 side chain hydrogen bonding <sup>a, b</sup> | Turn at $\alpha$ IIb G991 <sup>c</sup> | $\alpha$ IIb F992 or F993 membrane embedding <sup>d</sup> | $\beta 3$ K716 and $\alpha$ IIb F992 or F993 side chain contact at 6 (5, 4) Å <sup>e</sup> |
|---------------------------------------|-------------------------------------------------------------------------------------------------------------|---------------------------------------------------------------------------------|----------------------------------------|-----------------------------------------------------------|--------------------------------------------------------------------------------------------|
| All 500 models                        | 31%                                                                                                         | 16%                                                                             | 91%                                    | 81%                                                       | 72% (60%, 38%)                                                                             |
| Cluster 1 <sup>f</sup><br>(52 models) | 65%                                                                                                         | 30%                                                                             | 100%                                   | 92%                                                       | 90% (73%, 53%)                                                                             |

<sup>a</sup> Distance for hydrogen bonding cutoff is 3.5 Å.  
<sup>b</sup> At least one hydrogen bond between the three guanido N atoms of R995 and two side chain oxygens of D723.  
<sup>c</sup> Turn at G991 was defined by dihedral angle  $-60^\circ < \psi < 180^\circ$  and  $0^\circ < \phi < 180^\circ$ .  
<sup>d</sup> Membrane embedding was defined as a distance of the C $_{\zeta}$  atom of F992 or F993 from the membrane center of less than 17 Å.  
<sup>e</sup> At least one contact between K716 side chain carbons and F992 or F993 side chain carbons less than the indicated distance.  
<sup>f</sup> The largest cluster with 2.0 Å cutoff.

**Table S3A. Crosslinking efficiency and calculated Cα-Cα distance**

| Integrin TM+JM+CT |      | Corrected <sup>a</sup> |                 | idealized <sup>b</sup> | Upper boundary <sup>c</sup> |
|-------------------|------|------------------------|-----------------|------------------------|-----------------------------|
| αIIb              | β3   | Crosslinking(%)        | crosslinking(%) | Cα-Cα distance(Å)      | Cα-Cα distance(Å)           |
| W968              | L693 | 100.0                  | 100.0           | 3.60                   | 6.60                        |
| G972              | L697 | 77.0                   | 77.0            | 5.07                   | 9.68                        |
| G972              | V700 | 76.0                   | 63.0            | 5.14                   | 11.56                       |
| W968              | L697 | 62.3                   | 62.3            | 6.01                   | 11.65                       |
| V971              | L697 | 61.5                   | 61.5            | 6.06                   | 11.76                       |
| V969              | V700 | 62.5                   | 59.5            | 6.00                   | 12.03                       |
| G972              | V696 | 56.7                   | 56.7            | 6.37                   | 12.40                       |
| G972              | M701 | 67.7                   | 54.7            | 5.67                   | 12.67                       |
| G972              | L698 | 66.3                   | 53.3            | 5.76                   | 12.86                       |
| L983              | L709 | 54.5                   | 53.0            | 6.51                   | 12.90                       |
| V984              | L712 | 55.0                   | 52.0            | 6.48                   | 13.03                       |
| P998              | E731 | 80.0                   | 49.0            | 4.88                   | 13.43                       |
| V969              | L697 | 48.5                   | 44.0            | 6.90                   | 14.10                       |
| V973              | V700 | 69.3                   | 44.3            | 5.56                   | 14.06                       |
| W968              | V696 | 48.3                   | 48.3            | 6.91                   | 13.53                       |
| G975              | M701 | 51.3                   | 44.0            | 6.72                   | 14.10                       |
| N996              | D723 | 65.0                   | 43.5            | 5.84                   | 14.17                       |
| R997              | F730 | 60.0                   | 41.0            | 6.16                   | 14.51                       |
| P998              | F730 | 75.0                   | 41.0            | 5.20                   | 14.51                       |
| R997              | I719 | 49.0                   | 40.0            | 6.86                   | 14.64                       |
| L979              | L705 | 44.3                   | 38.3            | 7.16                   | 14.87                       |
| R997              | D723 | 70.0                   | 37.0            | 5.52                   | 15.04                       |
| L979              | M701 | 51.0                   | 34.0            | 6.74                   | 15.44                       |
| R997              | E726 | 63.0                   | 34.0            | 5.97                   | 15.44                       |
| V973              | L697 | 47.3                   | 33.3            | 6.97                   | 15.54                       |
| L980              | L705 | 38.0                   | 32.0            | 7.57                   | 15.71                       |
| R997              | F727 | 61.0                   | 32.0            | 6.10                   | 15.71                       |
| P998              | F727 | 82.0                   | 32.0            | 4.75                   | 15.71                       |
| N996              | E726 | 52.0                   | 31.0            | 6.67                   | 15.85                       |
| N996              | F727 | 50.0                   | 31.0            | 6.80                   | 15.85                       |
| G975              | L697 | 43.0                   | 29.0            | 7.25                   | 16.11                       |
| L980              | A711 | 51.7                   | 28.7            | 6.69                   | 16.15                       |
| V984              | A711 | 29.5                   | 28.0            | 8.11                   | 16.25                       |
| G975              | V700 | 51.3                   | 26.3            | 6.72                   | 16.48                       |
| V969              | V696 | 32.0                   | 27.5            | 7.95                   | 16.32                       |
| V969              | L698 | 30.5                   | 25.0            | 8.05                   | 16.65                       |
| V971              | V700 | 25.0                   | 25.0            | 8.40                   | 16.65                       |
| L980              | L712 | 34.5                   | 25.0            | 7.79                   | 16.65                       |
| V984              | L713 | 34.5                   | 25.0            | 7.79                   | 16.65                       |
| R997              | E731 | 43.0                   | 24.0            | 7.25                   | 16.78                       |
| L983              | L713 | 25.5                   | 23.5            | 8.37                   | 16.85                       |
| L980              | I704 | 28.5                   | 22.5            | 8.18                   | 16.99                       |
| L983              | L712 | 25.5                   | 22.5            | 8.37                   | 16.99                       |
| W968              | L698 | 30.3                   | 22.0            | 8.06                   | 17.05                       |
| N996              | A728 | 41.0                   | 22.0            | 7.38                   | 17.05                       |
| N996              | F730 | 34.0                   | 22.0            | 7.82                   | 17.05                       |
| G972              | L694 | 20.3                   | 20.3            | 8.70                   | 17.28                       |
| N996              | R724 | 41.0                   | 20.0            | 7.32                   | 17.32                       |

**GPA**

| GPA TM in |     | Corrected <sup>a</sup> |                 | idealized <sup>b</sup> | Upper boundary <sup>c</sup> |
|-----------|-----|------------------------|-----------------|------------------------|-----------------------------|
| αIIb      | β3  | Crosslinking(%)        | crosslinking(%) | Cα-Cα distance(Å)      | Cα-Cα distance(Å)           |
| G79       | V80 | 93.4                   | 88.9            | 4.02                   | 8.09                        |
| G79       | G79 | 91.8                   | 87.3            | 4.13                   | 8.31                        |
| G83       | G83 | 86.3                   | 83.0            | 4.47                   | 8.88                        |
| G83       | V84 | 74.5                   | 67.2            | 5.23                   | 11.00                       |
| V80       | V80 | 73.3                   | 66.7            | 5.31                   | 11.07                       |
| V80       | G83 | 65.3                   | 61.7            | 5.82                   | 11.74                       |
| T87       | T87 | 62.3                   | 59.7            | 6.01                   | 12.00                       |
| I88       | I91 | 60.5                   | 58.5            | 6.13                   | 12.16                       |
| I91       | I91 | 60.0                   | 53.0            | 6.16                   | 12.90                       |
| I88       | L90 | 65.0                   | 52.0            | 5.84                   | 13.03                       |
| G79       | G83 | 52.3                   | 47.8            | 6.65                   | 13.59                       |
| L90       | I91 | 63.0                   | 45.5            | 5.97                   | 13.90                       |
| L75       | I76 | 54.3                   | 44.8            | 6.53                   | 14.00                       |
| L75       | L75 | 63.0                   | 44.5            | 5.97                   | 14.04                       |
| V84       | V84 | 41.7                   | 38.0            | 7.33                   | 14.91                       |
| I88       | I88 | 48.0                   | 38.0            | 6.93                   | 14.91                       |
| L90       | L90 | 61.0                   | 38.0            | 6.10                   | 14.91                       |
| I76       | G79 | 35.0                   | 35.0            | 7.76                   | 15.31                       |
| T87       | I88 | 37.3                   | 31.7            | 7.61                   | 15.76                       |
| I76       | I76 | 33.0                   | 29.3            | 7.89                   | 16.08                       |
| G86       | G86 | 28.3                   | 28.0            | 8.19                   | 16.25                       |
| A82       | G83 | 29.0                   | 26.5            | 8.14                   | 16.45                       |
| G86       | T87 | 23.8                   | 23.4            | 8.48                   | 16.86                       |
| I91       | S92 | 30.0                   | 23.0            | 8.08                   | 16.92                       |
| S92       | G94 | 31.5                   | 22.0            | 7.98                   | 17.05                       |
| G79       | A82 | 26.3                   | 21.8            | 8.31                   | 17.07                       |
| I73       | L75 | 35.0                   | 21.0            | 7.76                   | 17.19                       |

<sup>a</sup>Corrected crosslinking efficiency was calculated as described in the supplement and Fig. S5; only ≥20% crosslinking was used for restraint generation.

<sup>b</sup>Idealized Cα-Cα distance was calculated with the uncorrected crosslinking efficiency.

<sup>c</sup>Upper boundary Cα-Cα distance was calculated with the corrected crosslinking efficiency.

**Table S3B. Crosslinking efficiency and calculated Cα-Cα distance of linker region**

| Integrin extracellular linker |      | Corrected <sup>a</sup> |                 | idealized <sup>b</sup> | Upper boundary <sup>c</sup> |
|-------------------------------|------|------------------------|-----------------|------------------------|-----------------------------|
| αIIb                          | β3   | Crosslinking(%)        | crosslinking(%) | Cα-Cα distance(Å)      | Cα-Cα distance(Å)           |
| L959                          | P688 | 100.0                  | 100.0           | 3.60                   | 10.60                       |
| E960                          | P688 | 98.0                   | 98.0            | 3.73                   | 10.79                       |
| R962                          | P691 | 56.0                   | 22.0            | 6.42                   | 17.93                       |
| A963                          | P691 | 34.0                   | 30.5            | 7.82                   | 17.13                       |
| I964                          | P691 | 57.5                   | 37.5            | 6.32                   | 16.48                       |
| I964                          | I693 | 89.5                   | 84.5            | 4.27                   | 12.06                       |
| I964                          | V696 | 42.0                   | 42.0            | 7.31                   | 16.05                       |
| P965                          | P691 | 96.0                   | 87.5            | 3.86                   | 11.78                       |
| P965                          | I693 | 97.0                   | 94.0            | 3.79                   | 11.16                       |

<sup>a</sup>Corrected crosslinking efficiency was calculated as described in the supplement and Fig. S5; only ≥20% crosslinking in redox buffer was used for restraint generation.

<sup>b</sup>Idealized Cα-Cα distance was calculated with the uncorrected crosslinking efficiency.

<sup>c</sup>Upper boundary Cα-Cα distance was calculated with the corrected crosslinking efficiency.

**Table S4. Format of C $\alpha$ -C $\alpha$  distance constraints for GPA transmembrane structure generation**

---

| res1 | atom1 | res2 | atom2 | upper | native   |
|------|-------|------|-------|-------|----------|
| 7    | CA    | 31   | CA    | 8.09  | #G79 V80 |
| 7    | CA    | 30   | CA    | 8.31  | #G79 G79 |
| 11   | CA    | 34   | CA    | 8.88  | #G83 G83 |
| 11   | CA    | 35   | CA    | 11.00 | #G83 V84 |
| 8    | CA    | 31   | CA    | 11.07 | #V80 V80 |
| 8    | CA    | 34   | CA    | 11.74 | #V80 G83 |
| 15   | CA    | 38   | CA    | 12.00 | #T87 T87 |
| 16   | CA    | 42   | CA    | 12.16 | #I88 I91 |
| 19   | CA    | 42   | CA    | 12.90 | #I91 I91 |
| 16   | CA    | 41   | CA    | 13.03 | #I88 L90 |
| 7    | CA    | 34   | CA    | 13.59 | #G79 G83 |
| 18   | CA    | 42   | CA    | 13.90 | #L90 I91 |
| 3    | CA    | 27   | CA    | 14.00 | #L75 I76 |
| 3    | CA    | 26   | CA    | 14.04 | #L75 L75 |
| 12   | CA    | 35   | CA    | 14.91 | #V84 V84 |
| 16   | CA    | 39   | CA    | 14.91 | #I88 I88 |
| 18   | CA    | 41   | CA    | 14.91 | #L90 L90 |
| 4    | CA    | 30   | CA    | 15.31 | #I76 G79 |
| 15   | CA    | 39   | CA    | 15.76 | #T87 I88 |
| 4    | CA    | 27   | CA    | 16.08 | #I76 I76 |
| 14   | CA    | 37   | CA    | 16.25 | #G86 G86 |
| 10   | CA    | 34   | CA    | 16.45 | #A82 G83 |
| 14   | CA    | 38   | CA    | 16.86 | #G86 T87 |
| 19   | CA    | 43   | CA    | 16.92 | #I91 S92 |
| 20   | CA    | 45   | CA    | 17.05 | #S92 G94 |
| 7    | CA    | 33   | CA    | 17.07 | #G79 A82 |
| 1    | CA    | 26   | CA    | 17.19 | #I73 L75 |
| 30   | CA    | 8    | CA    | 8.09  | #G79 V80 |
| 30   | CA    | 7    | CA    | 8.31  | #G79 G79 |
| 34   | CA    | 11   | CA    | 8.88  | #G83 G83 |
| 34   | CA    | 12   | CA    | 11.00 | #G83 V84 |
| 31   | CA    | 8    | CA    | 11.07 | #V80 V80 |
| 31   | CA    | 11   | CA    | 11.74 | #V80 G83 |
| 38   | CA    | 15   | CA    | 12.00 | #T87 T87 |
| 39   | CA    | 19   | CA    | 12.16 | #I88 I91 |
| 42   | CA    | 19   | CA    | 12.90 | #I91 I91 |
| 39   | CA    | 18   | CA    | 13.03 | #I88 L90 |
| 30   | CA    | 11   | CA    | 13.59 | #G79 G83 |
| 41   | CA    | 19   | CA    | 13.90 | #L90 I91 |
| 26   | CA    | 4    | CA    | 14.00 | #L75 I76 |
| 26   | CA    | 3    | CA    | 14.04 | #L75 L75 |
| 35   | CA    | 12   | CA    | 14.91 | #V84 V84 |
| 39   | CA    | 16   | CA    | 14.91 | #I88 I88 |
| 41   | CA    | 18   | CA    | 14.91 | #L90 L90 |
| 27   | CA    | 7    | CA    | 15.31 | #I76 G79 |
| 38   | CA    | 16   | CA    | 15.76 | #T87 I88 |
| 27   | CA    | 4    | CA    | 16.08 | #I76 I76 |
| 37   | CA    | 14   | CA    | 16.25 | #G86 G86 |
| 33   | CA    | 11   | CA    | 16.45 | #A82 G83 |
| 37   | CA    | 15   | CA    | 16.86 | #G86 T87 |
| 42   | CA    | 20   | CA    | 16.92 | #I91 S92 |
| 43   | CA    | 22   | CA    | 17.05 | #S92 G94 |
| 30   | CA    | 10   | CA    | 17.07 | #G79 A82 |
| 24   | CA    | 3    | CA    | 17.19 | #I73 L75 |

---

## **Supplemental Figure Legends**

### **Figure S1. Disulfide Crosslinking with Redox Buffer and DTT Treatment**

For constitutively crosslinked extracellular and exofacial residues, crosslinking was measured in redox buffer and after DTT treatment followed by Cu-phenanthroline as described in methods. The crosslinking patterns were plotted for GPA (A) and integrin (B).

### **Figure S2. Crosslinking in the Outer Membrane Leaflet Is Indistinguishable in Intact and Broken Cells**

293T cells were transiently transfected with the indicated integrin cysteine mutants and metabolically labeled. Disulfide crosslinking was induced with Cu-phenanthroline in intact (-) or freeze-thawed broken cells (+). Integrin heterodimers were immunoprecipitated from the cell extract with mAb AP3 and subjected to nonreducing SDS-PAGE and autoradiography (upper panel) and phosphorimaging for quantitation of crosslinking efficiency (lower panel).

### **Figure S3. Kinetics of Crosslinking**

Crosslinking was measured as described in Methods, except treatment with Cu-phenanthroline was for 0, 10, 30 or 60 mins.

### **Figure S4. Crosslinking between Nonidentical GPA TM Residues with Different Integrin Subunit Fusion Partners (Symmetry Test)**

293T cells were co-transfected with  $\alpha$ IIb/GPA71-131 G79 or V80 cysteine mutants and the indicated  $\beta$ 3/GPA71-131 cysteine mutants. Alternatively, 293T cells were co-transfected with  $\beta$ 3/GPA71-131 G79 or V80 cysteine mutant and the indicated  $\alpha$ IIb/GPA71-131 cysteine mutants. Crosslinking efficiency was measured as described in Methods. The plots show that GPA TM crosslinking was independent of the integrin subunit fusion partner, demonstrating a lack of effect of the integrin fusion partner on the GPA structure, and suggesting that

symmetry was maintained in the GPA TM domain despite coupling to the asymmetric integrin ectodomain.

### **Figure S5. “Near Valley Correction” of Disulfide Crosslinking Efficiency**

To compensate for inherent flexibility or structural perturbations introduced by cysteine mutation, the lowest crosslinking efficiency within 2 residues of crosslinked residues  $i$  or  $j$  was subtracted from the crosslinking efficiency of residue pair  $i$  and  $j$  as described in Methods, before restraint calculation.

### **Figure S6. Integrin and GPA Structure Generation**

Procedure for structure generation of  $\alpha$ IIB $\beta$ 3 integrin TM, JM and cytoplasmic domains (A and B) and GPA TM domain (C and D). Residues of TM domains are in blue and marked by dashed lines. TM regions were divided into three overlapping, 12-residue segments (blue lines labeled N, M, or C for N-terminal, middle, C-terminal, respectively). The 12-residue segments were fixed as ideal  $\alpha$ -helices with rigid sidechains and docked with the Rosetta global docking protocol in a modeled membrane slab (stage 1). The color codes in the schematic show in subsequent stages which residues were kept from the previous stage and which were grown. Arrows show the direction of chain growing. The 1,000 models in the first stage, which had already been selected to be among the lowest 10% in energy, were scored with the disulfide-based distance constraints, and 100 models with the lowest (or no) pairwise disulfide constraints violations were selected as the starting structures for chain growing. In chain growing stages 2-4, backbones of the first two or more residues of the starting structures were fixed, and structures of the remaining residues were built with the Rosetta fragment assembly protocol with energy scoring function for membrane protein and disulfide crosslinking-based distance constraints. Between each stage of building 5,000 to

10,000 models, 100 models with low disulfide restraint violation and low energy (not including disulfide restraint violation penalties) were selected for the next stage. At the final stage, the 10% low energy models were clustered based on root-mean-square deviation (RMSD) of  $C_{\alpha}$  atoms for residues in the range,  $\alpha_{IIb}$  I966-P998 and  $\beta_3$  I693-E731 or GPA 73-95. Plots show the correlation of Rosetta all-atom energy (without disulfide restraint penalties) versus disulfide constraints violation scores in stages 1-4. The 100 models selected in successive stages are shown in magenta, and those in the largest cluster in the final stages are shown in red. The five most populous integrin (B) and GPA (D) clusters are summarized. Integrin results are shown both for clustering with 2.0 and 3.0 Å cutoffs, with the latter results in parentheses. The energies shown in A-D do not include disulfide restraint violation penalties.

### **Figure S7. Center Models of the 5 Largest Clusters**

Models and sequence are presented and colored as described in Figure 4. A and B. Central integrin models (from a total of 500 low energy structures) are shown both after clustering at 2.0 Å (A) and 3.0 Å (B) as described in the Fig. S6 legend. Clusters are after 4 stages, whereas the cluster structures shown in Fig. 4A are after a 5<sup>th</sup> stage of growing extracellular linkers with redox buffer disulfide restraints. C. Central GPA models (from a total of 1000 low energy structures) are after clustering at 1.0 Å.

### **Figure S8. Comparison of TM Structures Generated with and without Disulfide-Based Distance Constraints**

A. Superposition of GPA NMR structure (red) and GPA models generated without disulfide-based distance constraints (green, center models of top 5 clusters). B. Superposition of integrin TM structures generated with (red, center model of the largest cluster) or without



disulfide-based distance constraints (green, center models of top 5 clusters). Structures without distance restraints were generated as described in Figure S6, except structures to seed the next stage were selected based only on Rosetta energy.

### **Figure S9. Superposition of the 500 Low-Energy $\alpha_{\text{IIB}}\beta_3$ Models on the TM Domains**

This represents the ensemble after 4 stages, whereas the cluster structures shown in Fig. 4A are after a 5<sup>th</sup> stage of growing the extracellular linkers with redox buffer disulfide restraints.

### **Figure S10. Sequence Alignment of Integrin TM and Juxtamembrane Regions**

All human integrin  $\alpha$  and  $\beta$  subunit sequences are aligned. The boundary of TM and juxtamembrane regions is marked with a dashed line. Green stars indicate residues showing disulfide crosslinking peaks in  $\alpha_{\text{IIB}}$  and  $\beta_3$ . The conserved small amino acids (G, A or S) in both  $\alpha$  and  $\beta$  TM domains are marked in yellow and correspond to the Gly in  $\alpha_{\text{IIB}}$  and  $\beta_3$  TM interfaces. The Lys or Arg conserved at the boundary of TM and juxtamembrane region for  $\beta$  integrins are marked in cyan.

### **Figure S11. Ramachandran Plots for Residue $\alpha_{\text{IIB}}$ Gly-991**

A. All 500 low energy models. B. The cluster 1 structural ensemble. The figure was generated by the RAMPAGE server (Lovell et al., 2003). In B, the position of the final cluster center structure is shown in red.

### **Figure S12. Disulfide Crosslinking Efficiency within Regions Defined in Integrin Ectodomain Crystal Structures Near the Linker to the TM Domains and Correlation with Distance**

Disulfide crosslinking efficiency in redox buffer is plotted against distance in  $\alpha_{\text{IIB}}\beta_3$  (Zhu et al., 2008) and  $\alpha_{\text{V}}\beta_3$  (Xiong et al., 2002) crystal structures. The specific residues tested in  $\alpha_{\text{IIB}}\beta_3$  or homologous residues in  $\alpha_{\text{V}}\beta_3$  are indicated. Note that a disulfide was introduced by

mutation to cysteine of L959 and P688 in the  $\alpha_{\text{IIB}}\beta_3$  crystal structure and these residues must by definition be close in the  $\alpha_{\text{IIB}}\beta_3$  structure; however, the homologous I955 and P688 residues in  $\alpha_{\text{V}}\beta_3$  are similarly close. To calculate distances in  $\alpha_{\text{V}}\beta_3$ , the  $\alpha_{\text{IIB}}$  and  $\alpha_{\text{V}}$  sequences were aligned; the sequence in the  $\alpha_{\text{V}}$  structure extends more C-terminally than in  $\alpha_{\text{IIB}}$ . The upper bound distance used in restraints for building ectodomain models is shown as a dashed line.

**Figure S13. Lack of Relationship among Three NMR  $\alpha_{\text{IIB}}\beta_3$  Cytoplasmic Domain Structures and the Disulfide/Rosetta Structure**

NMR structures with the indicated PDB ID codes (blue) were superimposed on the juxtamembrane/cytoplasmic portion of the Disulfide/Rosetta structure (red) using C $\alpha$  atoms of residues  $\alpha_{\text{IIB}}$  989-997 and  $\beta_3$  716-737. Structures are from (Vinogradova et al., 2002) (A) and (Weljie et al., 2002) (B and C).

## Supplemental References

- Barth, P., Schonbrun, J., and Baker, D. (2007). Toward high-resolution prediction and design of transmembrane helical protein structures. *Proc. Natl. Acad. Sci. U.S.A* *104*, 15682-15687.
- Barth, P., Wallner, B., and D., B. (2009). Prediction of membrane protein structures with complex topologies using limited constraints. *Proc. Natl. Acad. Sci. U.S.A* *106*, 1409-1414.
- Bonneau, R., Strauss, C.E., Rohl, C.A., Chivian, D., Bradley, P., Malmstrom, L., Robertson, T., and Baker, D. (2002). De novo prediction of three-dimensional structures for major protein families. *J Mol Biol* *322*, 65-78.
- Bradley, P., and Baker, D. (2006). Improved beta-protein structure prediction by multilevel optimization of nonlocal strand pairings and local backbone conformation. *Proteins* *65*, 922-929.
- Gottschalk, K.E. (2005). A coiled-coil structure of the  $\alpha$ IIb $\beta$ 3 integrin transmembrane and cytoplasmic domains in its resting state. *Structure* *13*, 703-712.
- Karplus, K., Karchin, R., Draper, J., Casper, J., Mandel-Gutfreund, Y., Diekhans, M., and Hughey, R. (2003). Combining local-structure, fold-recognition, and new fold methods for protein structure prediction. *Proteins* *53 Suppl 6*, 491-496.
- Lovell, S.C., Davis, I.W., Arendall, W.B., de Bakker, P.I., Word, J.M., Prisant, M.G., Richardson, J.S., and Richardson, D.C. (2003). Structure validation by Ca geometry: phi, psi and C $\beta$  deviation. *Proteins* *50*, 437-450.
- Luo, B.-H., Springer, T.A., and Takagi, J. (2004). A specific interface between integrin transmembrane helices and affinity for ligand. *PLoS Biol.* *2*, 776-786.
- Partridge, A.W., Liu, S., Kim, S., Bowie, J.U., and Ginsberg, M.H. (2005). Transmembrane domain packing stabilizes integrin  $\alpha$ IIb $\beta$ 3 in the low affinity state. *J. Biol. Chem.* *280*, 7294-7200.
- Peerschke, E.I. (1995). Regulation of platelet aggregation by post-fibrinogen binding events. *Thromb. Haemostas.* *73*, 862-867.
- Rohl, C.A., Strauss, C.E., Misura, K.M., and Baker, D. (2004). Protein structure prediction using Rosetta. *Methods in enzymology* *383*, 66-93.
- Smith, S.O., Song, D., Shekar, S., Groesbeek, M., Ziliox, M., and Aimoto, S. (2001). Structure of the transmembrane dimer interface of glycoprotein A in membrane bilayers. *Biochemistry* *40*, 6553-6558.
- Takagi, J., Petre, B.M., Walz, T., and Springer, T.A. (2002). Global conformational rearrangements in integrin extracellular domains in outside-in and inside-out signaling. *Cell* *110*, 599-611.
- Vinogradova, O., Velyvis, A., Velyviene, A., Hu, B., Haas, T.A., Plow, E.F., and Qin, J. (2002). A structural mechanism of integrin  $\alpha$ IIb $\beta$ 3 "inside-out" activation as regulated by its cytoplasmic face. *Cell* *110*, 587-597.
- Weljie, A.M., Hwang, P.M., and Vogel, H.J. (2002). Solution structures of the cytoplasmic tail complex from platelet  $\alpha$ IIb- and  $\beta$ 3-subunits. *Proc. Natl. Acad. Sci. USA* *99*, 5878-5883.
- Xiong, J.P., Stehle, T., Zhang, R., Joachimiak, A., Frech, M., Goodman, S.L., and Arnaout, M.A. (2002). Crystal structure of the extracellular segment of integrin  $\alpha$ V $\beta$ 3 in complex with an Arg-Gly-Asp ligand. *Science (New York, N.Y)* *296*, 151-155.
- Zhu, J., Luo, B.H., Xiao, T., Zhang, C., Nishida, N., and Springer, T.A. (2008). Structure of a Complete Integrin Ectodomain in a Physiologic Resting State and Activation and Deactivation by Applied Forces. *Mol. cell* *32*, 849-861.

# Supplemental Figures

## A

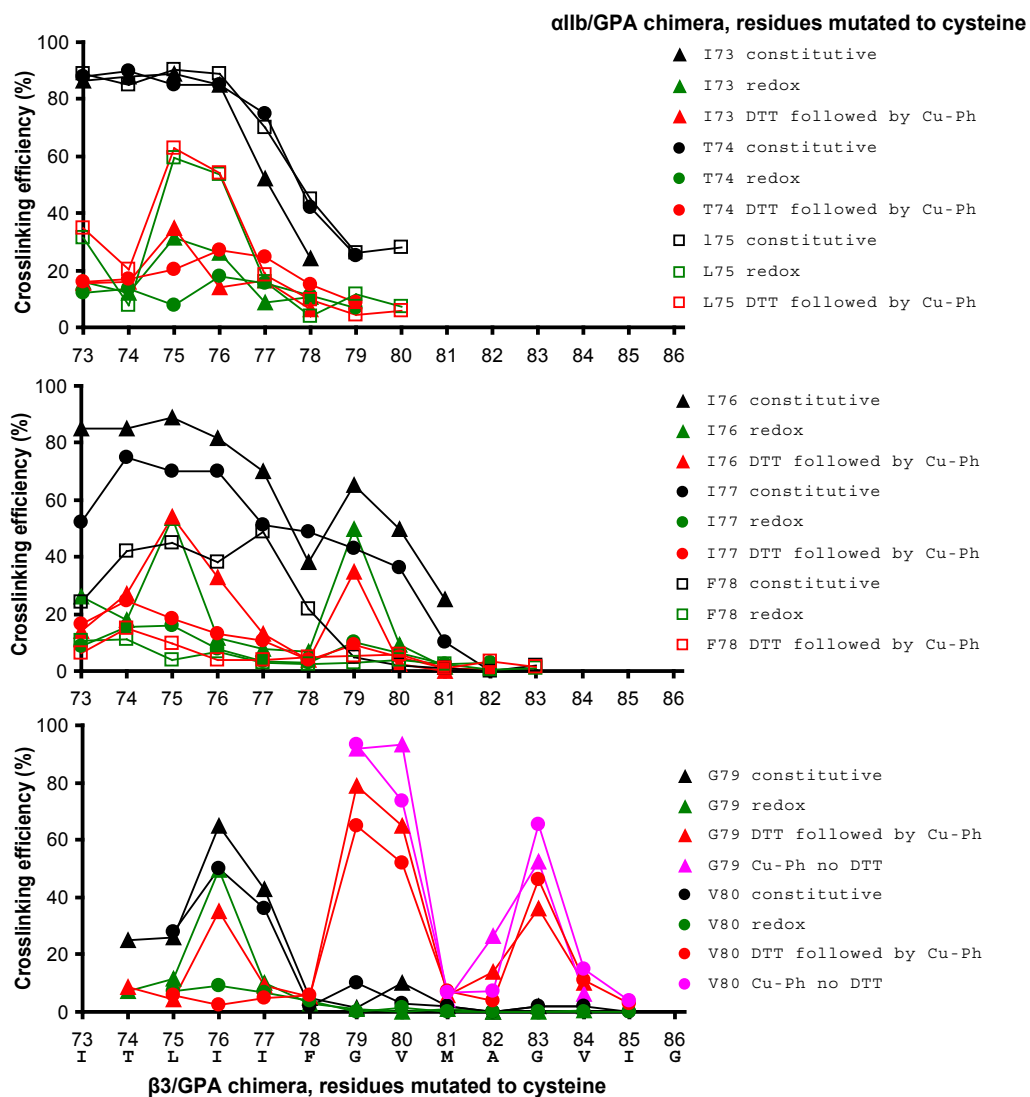

## B

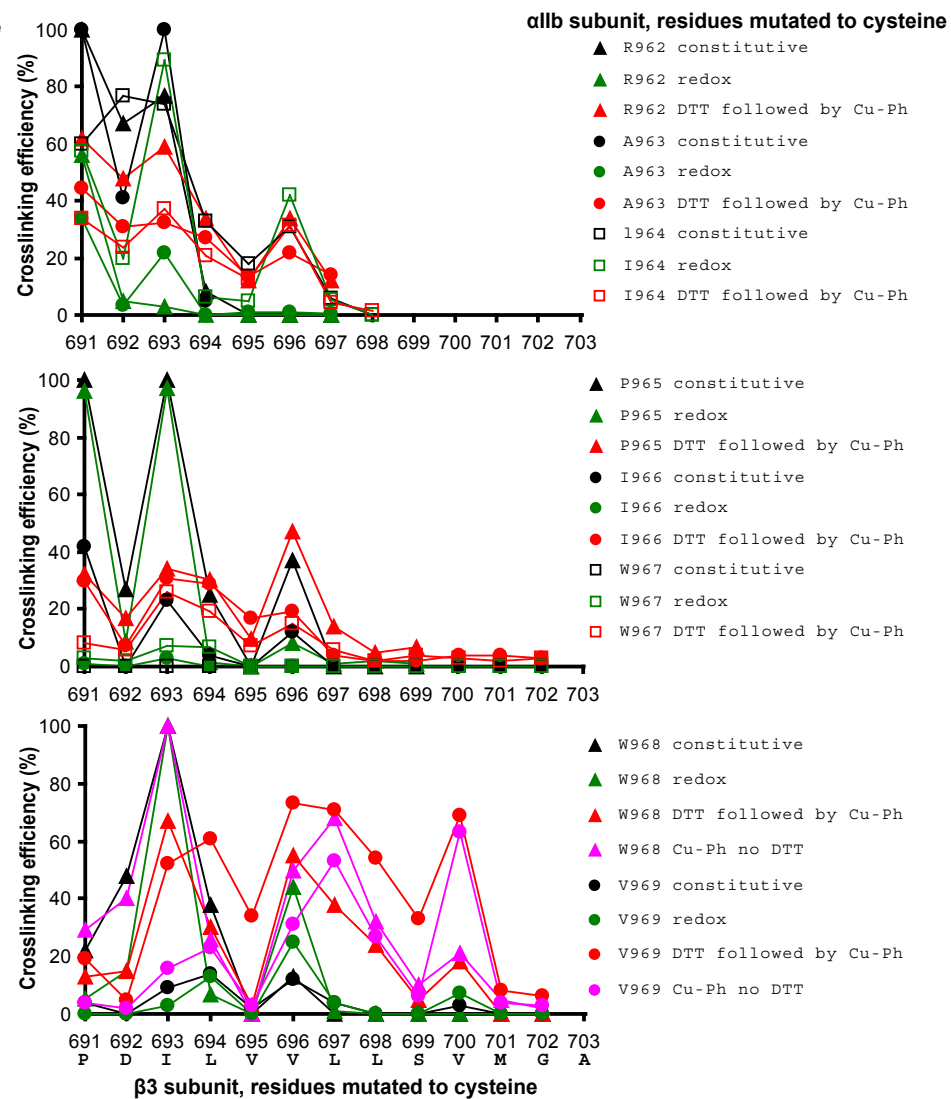

Figure S1

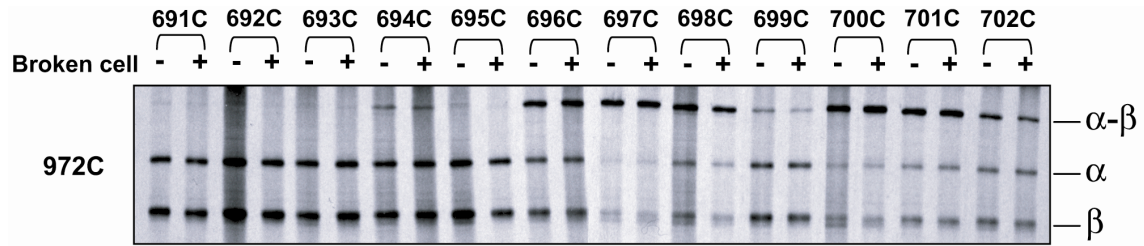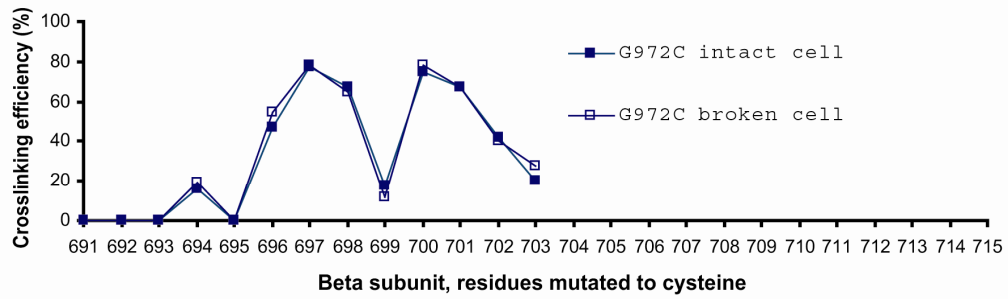

Figure S2

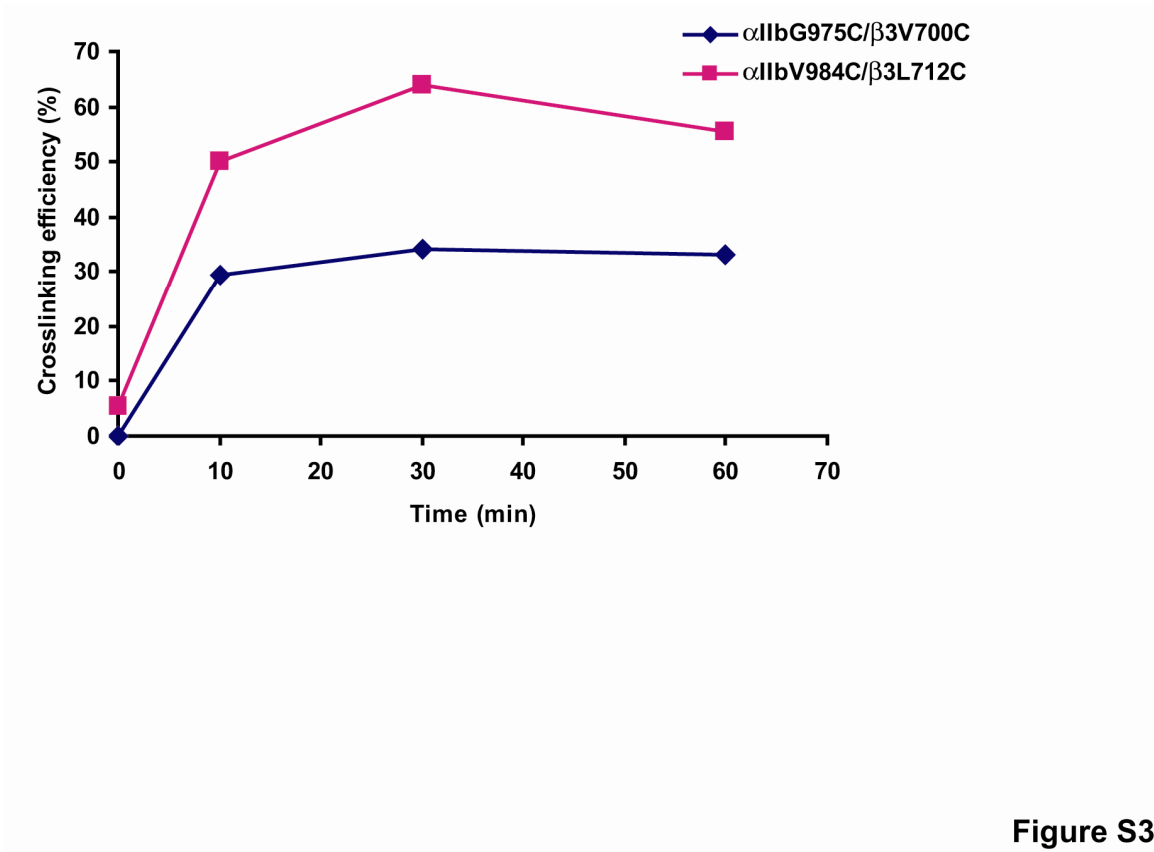

Figure S3

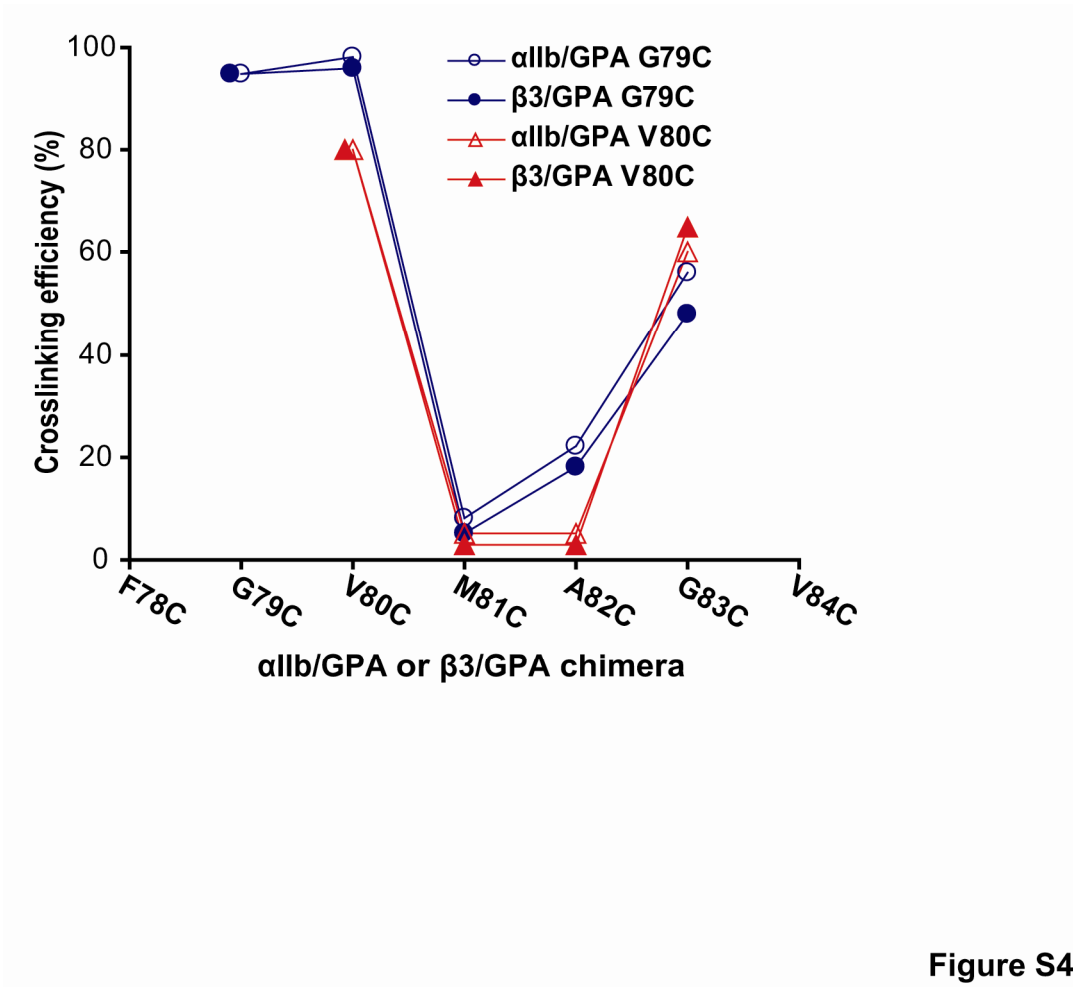

Figure S4

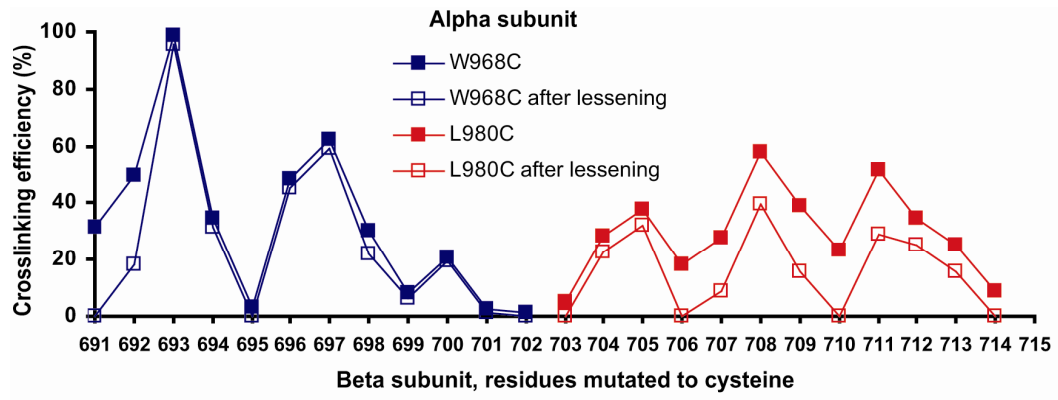

Figure S5



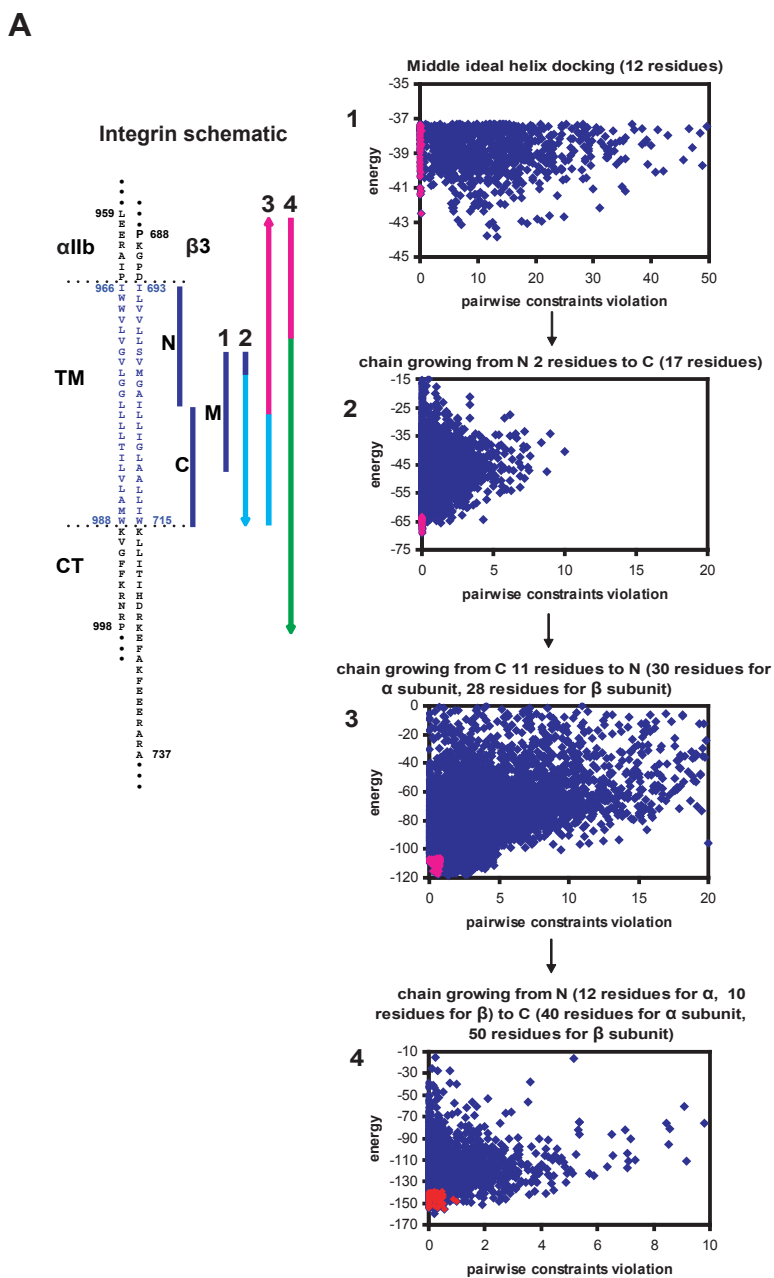

**B**

Select 10% lowest energy models (500) for clustering, rmsd cutoff: 2.0 Å (3.0 Å)

| Cluster No. | Cluster size | Average energy              | Average pairwise constraints violation |
|-------------|--------------|-----------------------------|----------------------------------------|
| 1           | 52 (224)     | -145.82±4.61 (-144.26±4.11) | 0.26±0.23 (0.26±0.27)                  |
| 2           | 17 (79)      | -144.93±3.82 (-143.64±3.51) | 0.13±0.18 (0.27±0.29)                  |
| 3           | 13 (23)      | -142.74±3.99 (-143.68±3.68) | 0.30±0.17 (0.44±0.56)                  |
| 4           | 12 (18)      | -143.83±2.78 (-144.34±3.93) | 0.25±0.17 (0.25±0.21)                  |
| 5           | 9 (17)       | -142.53±2.75 (-144.46±3.21) | 0.36±0.44 (0.31±0.24)                  |

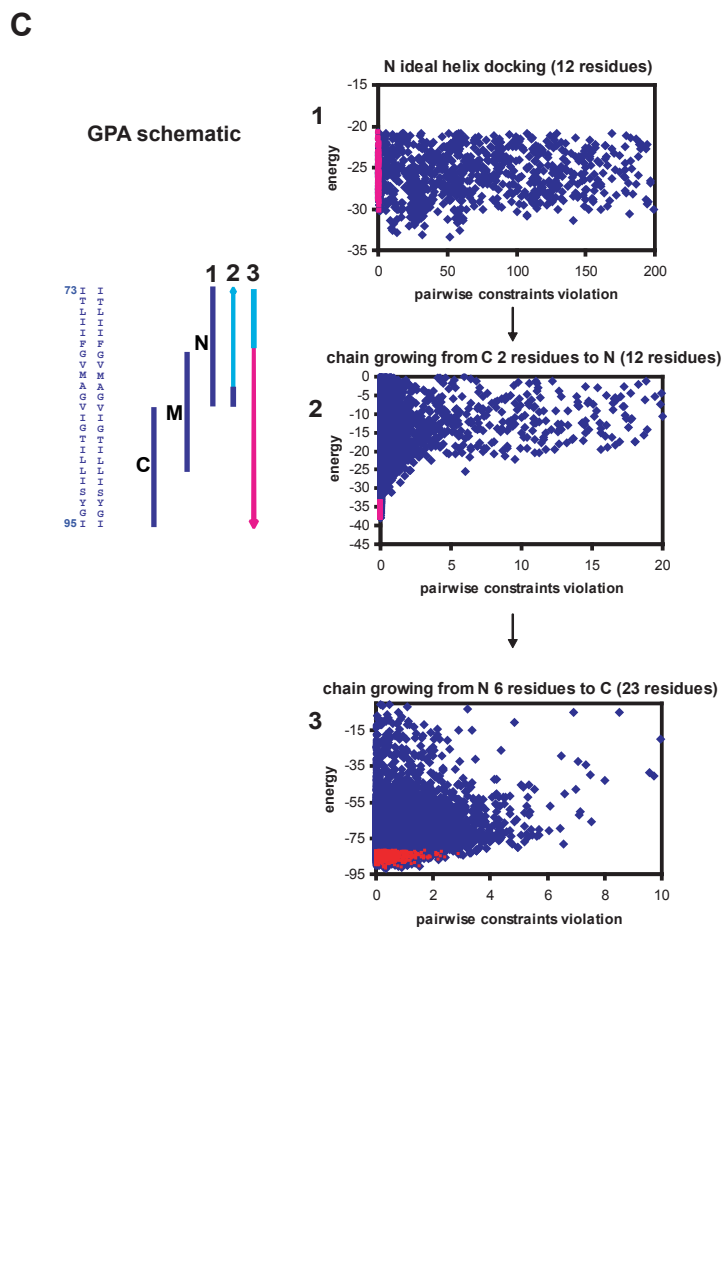

**D**

Select 10% lowest energy models (1000) for clustering, rmsd cutoff: 1.0 Å

| Cluster No. | Cluster size | Average energy | Average pairwise constraints violation | rmsd of center model to NMR structure (Å) |
|-------------|--------------|----------------|----------------------------------------|-------------------------------------------|
| 1           | 652          | -84.70±1.91    | 0.46±0.45                              | 0.71                                      |
| 2           | 78           | -84.66±1.73    | 0.28±0.47                              | 0.99                                      |
| 3           | 48           | -83.81±1.16    | 0.79±0.79                              | 1.43                                      |
| 4           | 38           | -84.37±1.95    | 0.65±0.65                              | 1.55                                      |
| 5           | 34           | -84.04±1.45    | 0.20±0.28                              | 0.92                                      |

**Figure S6**



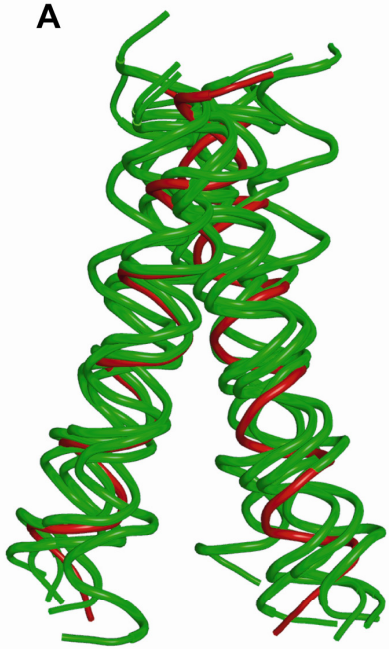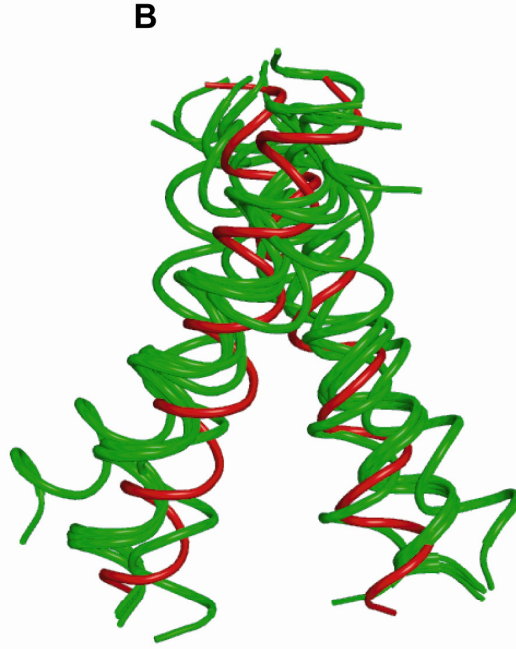

**Figure S8**

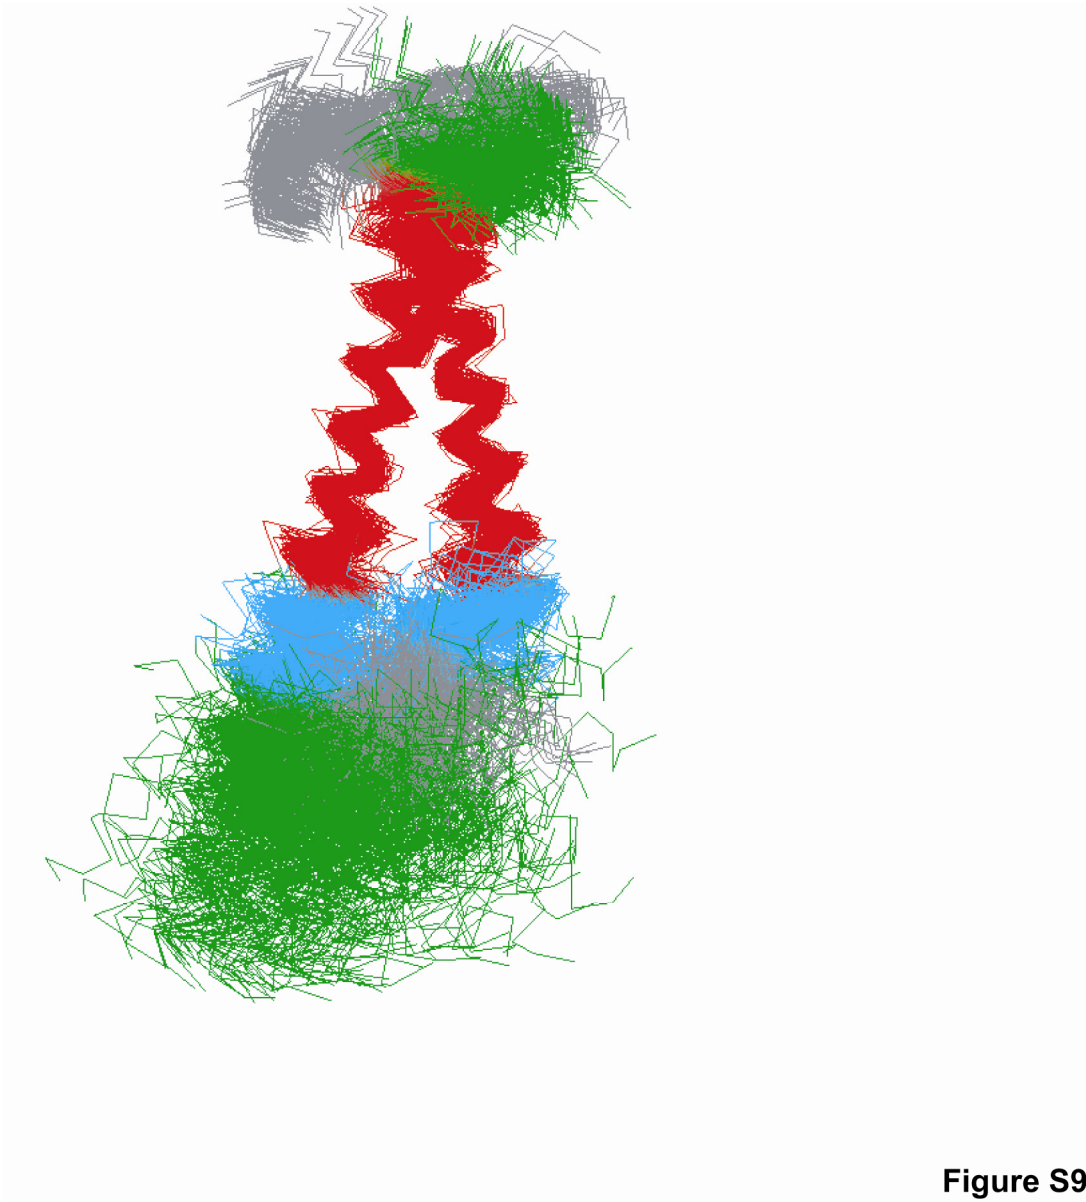

**Figure S9**



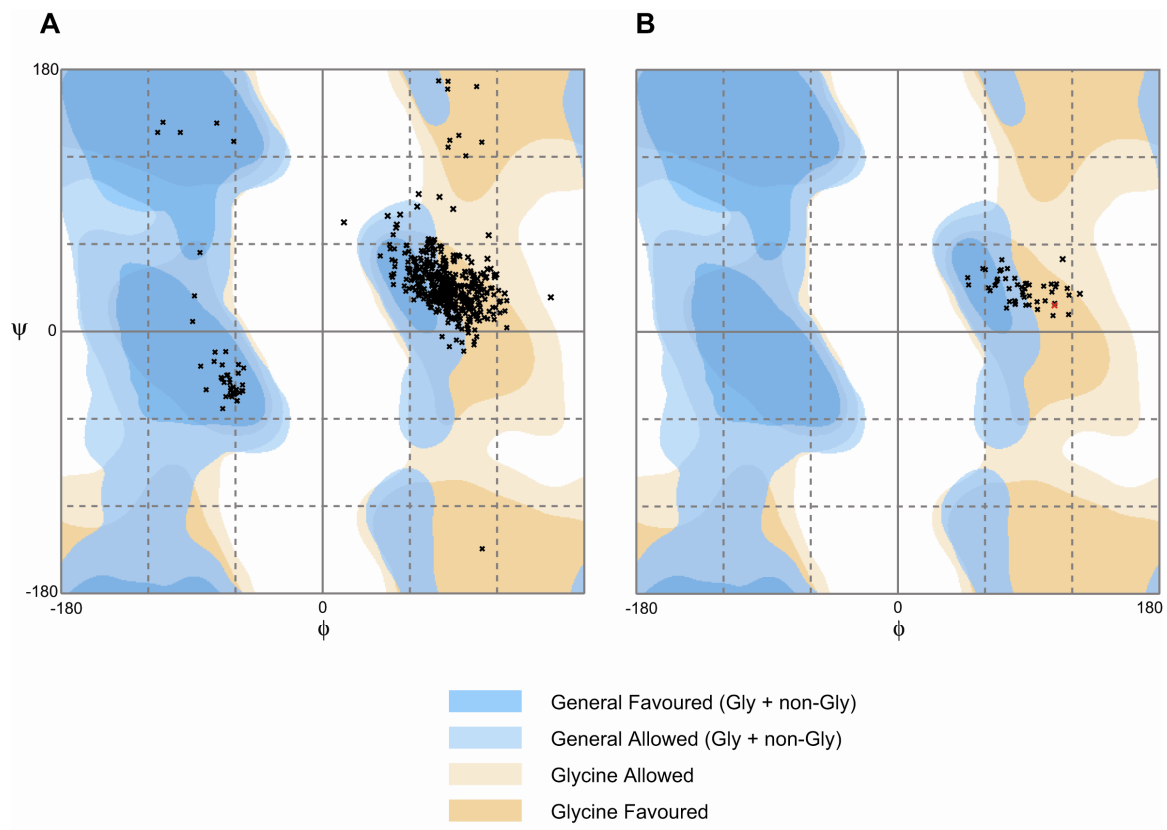

Figure S11

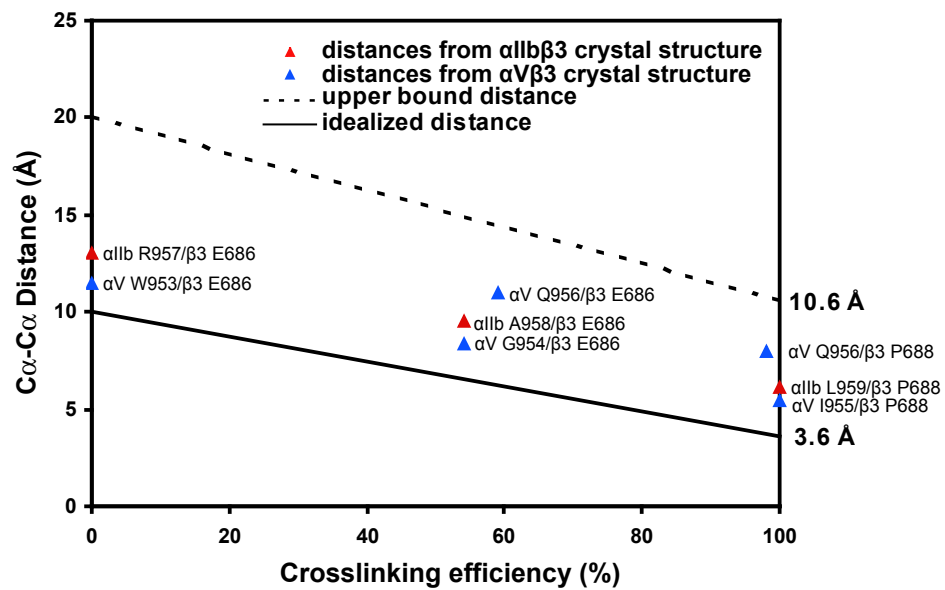

Figure S12

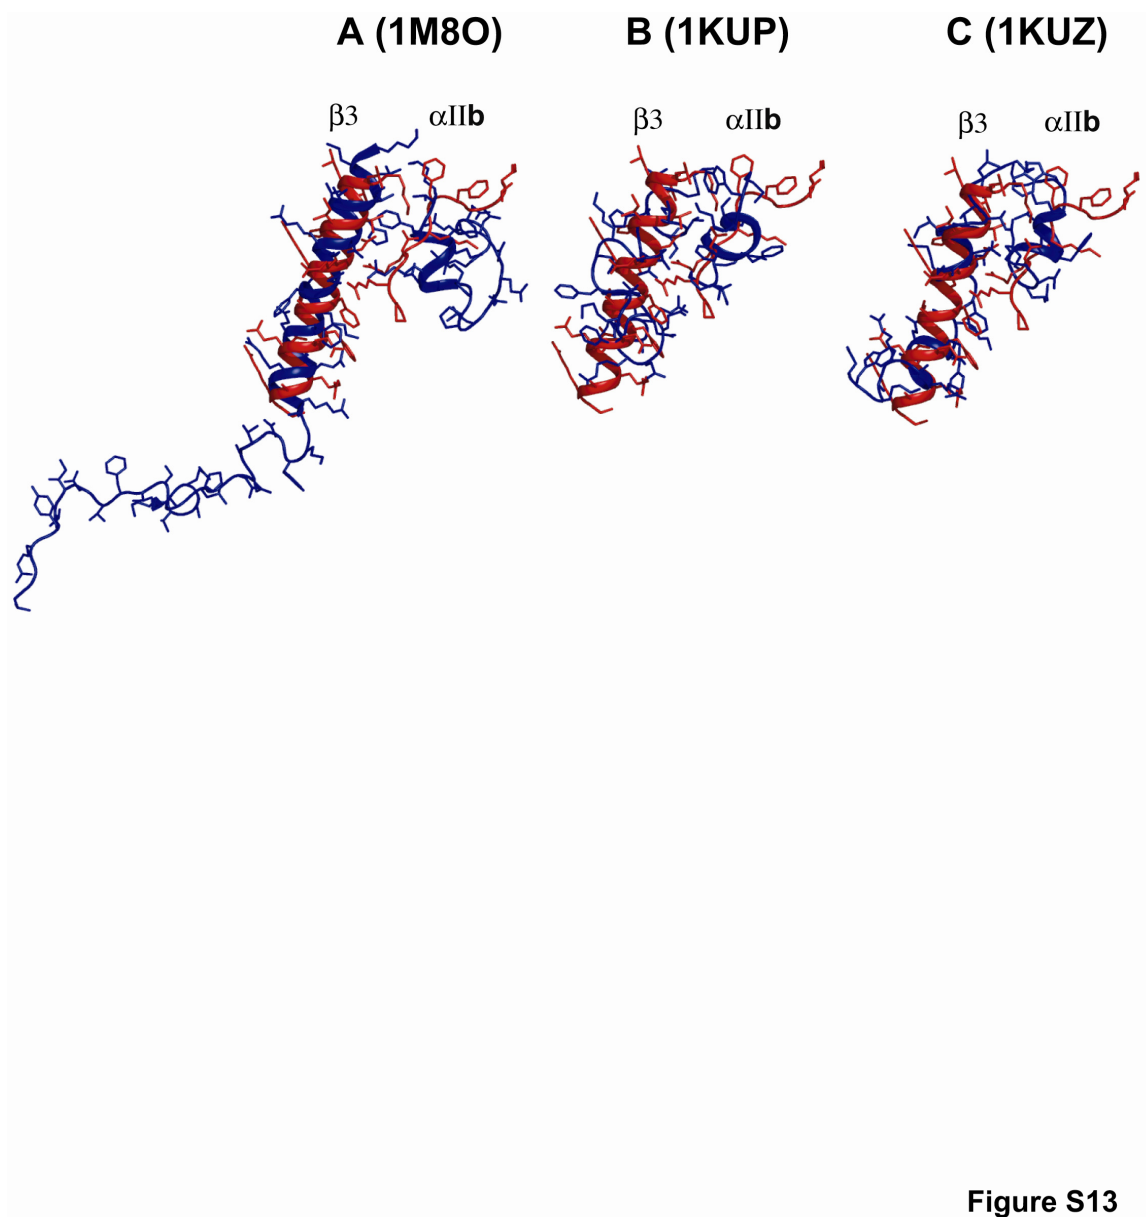

Supplement: NIHMS113314-supplement-01.pdf [file NIHMS113314-supplement-01.pdf]
